# Supplementary material for: Zinc-Guided 3D Graphene for Thermally Chargeable Supercapacitors to Harvest Low-Grade Heat
Source: MDPI journal article supplement (doi:10.3390/molecules27041239), 2022-02-12
Supplement: s1 [file s1]

## Supporting Information

# Zinc-Guided 3D Graphene for Thermally Chargeable Supercapacitors to Harvest Low-Grade Heat

Qi Wang, Pengyuan Liu <sup>†</sup>, Fanyu Zhou <sup>†</sup>, Lei Gao <sup>†</sup>, Dandan Sun, Yuhang Meng and Xuebin Wang <sup>\*</sup>

**Table S1.** Comparison of thermal conversion ability of ZnG and other state-of-the-art materials.

| Electrodes                               | Electrolyte                                                                            | Seebeck Coefficient (mV °C <sup>-1</sup> ) | Temperature Difference (°C) | Specific Energy/Power Output | Reference |
|------------------------------------------|----------------------------------------------------------------------------------------|--------------------------------------------|-----------------------------|------------------------------|-----------|
| Rice husk char//rice husk char           | 20% NaCl                                                                               | 1.34                                       | 50                          | 106.7 mJ g <sup>-1</sup>     | [1]       |
| Carbon cloth//carbon cloth               | 0.1 M K <sub>3</sub> Fe(CN) <sub>6</sub> /K <sub>4</sub> Fe(CN) <sub>6</sub> (PVA gel) | 1.2                                        | 50                          | 973.6 μJ cm <sup>-2</sup>    | [2]       |
| Pt//304 stainless steel                  | 0.4 M iodide/triiodide                                                                 | 0.26                                       | 30                          | —                            | [3]       |
| NiNC//NiNC                               | 1 M NaC <sub>2</sub> H <sub>3</sub> O <sub>2</sub> (FA)                                | 2.5                                        | 45                          | 1.8 mJ g <sup>-1</sup>       | [4]       |
| Carbon cloth//carbon cloth               | 0.4 M K <sub>3</sub> Fe(CN) <sub>6</sub> /K <sub>4</sub> Fe(CN) <sub>6</sub> (PAC gel) | 0.75                                       | 20                          | 95 mW m <sup>-2</sup>        | [5]       |
| rSGO//rSGO                               | SGO (2M H <sub>2</sub> SO <sub>4</sub> )                                               | 4.53                                       | 14                          | 894 μC cm <sup>-2</sup>      | [6]       |
| Nanoporous carbon//Pt                    | 1 M LiCl                                                                               | 0.68                                       | 40                          | —                            | [7]       |
| Nanoporous carbon (Cabot BP2000)//Pt     | 0.1M LiCl                                                                              | 0.8                                        | 39                          | 100 mJ g <sup>-1</sup>       | [8]       |
| NanoTuneX Y-Carbon//Pt                   | 2 M EMIMTFSI (AN)                                                                      | −0.3                                       | 20                          | 0.05 mJ m <sup>-2</sup>      | [9]       |
| 10 Farad supercapacitor (YEC PI series)  | TEA-BF <sub>4</sub> (acetonitrile )                                                    | 0.6                                        | 65                          | 185 mJ g <sup>-1</sup>       | [10]      |
| Pt//Pt                                   | Emim-Cl (PVA gel)                                                                      | 10                                         | 33                          | 1.7 mJ g <sup>-1</sup>       | [11]      |
| AC (YP-80F)//AC (YP-80F)                 | 1 M KNO <sub>3</sub>                                                                   | 1.21                                       | 52                          | —                            | [12]      |
| P-G/CNT//P-G/CNT                         | Polystyrene sulfonic acid film                                                         | 0.2                                        | 5                           | —                            | [13]      |
| Porous carbon//porous carbon             | 1 M NaC <sub>2</sub> H <sub>3</sub> O <sub>2</sub> + Cu                                | 5.3                                        | 50                          | 4.2 W m <sup>-2</sup>        | [14]      |
| Nanoporous graphene//nanoporous graphene | 0.01 M KCl                                                                             | 4.54                                       | 35                          | 1.38 mW·g <sup>-1</sup>      | [15]      |
| ZnG//ZnG                                 | 1 M KNO <sub>3</sub>                                                                   | 0.66                                       | 20                          | 226 mJ g <sup>-1</sup>       | This work |

## References

1. Zhang, X.; Xu, D.; Xiong, Y. Effect of hydrothermal on thermoelectric properties of rice husk char. *Chem. Ind. Eng. Prog.* **2020**, *39*, 2632–2638.
2. Kundu, A.; Fisher, T.S. Harnessing the thermogalvanic effect of the ferro/ferricyanide redox couple in a thermally chargeable supercapacitor. *Electrochim. Acta* **2018**, *281*, 357–369.
3. Alzahrani, H. A.; Black, J.J.; Goonetilleke, D.; Panchompoo, J.; Aldous, L. Combining thermogalvanic corrosion and thermogalvanic redox couples for improved electrochemical waste heat harvesting. *Electrochem. Commun.* **2015**, *58*, 76–79.
4. Lim, H.; Shi, Y.; Qiao, Y. Thermally chargeable supercapacitor based on nickel-coated nanoporous carbon. *Int. J. Green Energy* **2018**, *15*, 53–56.
5. Buckingham, M.A.; Zhang, S.; Liu, Y.; Chen, J.; Marken, F.; Aldous, L. Thermogalvanic and Thermocapacitive Behavior of Superabsorbent Hydrogels for Combined Low-Temperature Thermal Energy Conversion and Harvesting. *ACS Appl. Energy Mater.* **2021**, *4*, 11204–11214.
6. Mageeth, A.M.A.; Park, S.; Jeong, M.; Kim, W.; Yu, C. Planar-type thermally chargeable supercapacitor without an effective heat sink and performance variations with layer thickness and operation conditions. *Appl. Energy* **2020**, *268*, 114975.
7. Lim, H.; Zhao, C.; Qiao, Y. Performance of thermally-chargeable supercapacitors in different solvents. *Phys. Chem. Chem. Phys.* **2014**, *16*, 12728–12730.
8. Lim, H.; Lu, W.; Chen, X.; Qiao, Y. Effects of ion concentration on thermally-chargeable double-layer supercapacitors. *Nanotechnology* **2013**, *24*, 465401.
9. Bonetti, M.; Nakamae, S.; Huang, B.T.; Salez, T.J.; Wiertel-Gasquet, C.; Roger, M. Thermoelectric energy recovery at ionic-liquid/electrode interface. *J. Chem. Phys.* **2015**, *142*, 244708.
10. Härtel, A.; Janssen, M.; Weingarth, D.; Presser, V.; van Rooij, R. Heat-to-current conversion of low-grade heat from a thermocapacitive cycle by supercapacitors. *Energy Environ. Sci.* **2015**, *8*, 2396–2401.
11. Horike, S.; Wei, Q.; Kirihara, K.; Mukaida, M.; Sasaki, T.; Koshiba, Y.; Fukushima, T.; Ishida, K. Outstanding electrode-dependent Seebeck coefficients in ionic hydrogels for thermally chargeable supercapacitor near room temperature. *ACS Appl. Mater. Interfaces* **2020**, *12*, 43674–43683.
12. Chen, D.; Li, Z.; Jiang, J.; Wu, J.; Shu, N.; Zhang, X. Influence of electrolyte ions on rechargeable supercapacitor for high value-added conversion of low-grade waste heat. *J. Power Sources* **2020**, *465*, 228263.
13. Kim, S.L.; Lin, H.T.; Yu, C. Thermally Chargeable Solid-State Supercapacitor. *Adv. Energy Mater.* **2016**, *6*, 1600546.
14. Meng, T.; Xuan, Y. Enhancing Conversion Efficiency and Storage Capacity of a Thermally Self-Chargeable Supercapacitor. *Adv. Mater. Interfaces* **2020**, *7*, 2000934.
15. Yang, Z.; Dang, F.; Zhang, C.; Sun, S.; Zhao, W.; Li, X.; Liu, Y.; Chen, X. Harvesting Low-Grade Heat via Thermal-Induced Electric Double Layer Redistribution of Nanoporous Graphene Films. *Langmuir* **2019**, *35*, 7713–7719.
